# 1 Genomic analysis reveals a polygenic architecture of 2 antler morphology in wild red deer (*Cervus elaphus*).

3 Lucy Peters<sup>1\*</sup>, Jisca Huisman<sup>1</sup>, Loeske E.B. Kruuk<sup>1,2</sup>,  
4 Josephine M. Pemberton<sup>1</sup>, Susan E. Johnston<sup>1\*</sup>

5 <sup>1</sup>Institute of Evolutionary Biology, School of Biological Sciences, University of Edinburgh,  
6 Edinburgh, EH9 3FL, United Kingdom.

7 <sup>2</sup>Research School of Biology, The Australian National University, Canberra, Australia.

8 \*Corresponding authors: Lucy.Peters@ed.ac.uk & Susan.Johnston@ed.ac.uk

## 9 Abstract

10 Sexually-selected traits show large variation and rapid evolution across the animal  
11 kingdom, yet genetic variation often persists within populations despite apparent  
12 directional selection. A key step in solving this long-standing paradox is to determine the  
13 genetic architecture of sexually-selected traits to understand evolutionary drivers and  
14 constraints at the genomic level. Antlers are a form of sexual weaponry in male red deer.  
15 On the island of Rum, Scotland, males with larger antlers have increased breeding  
16 success, yet there has been no response to selection observed at the genetic level. To  
17 better understand the underlying mechanisms of this observation, we investigate the  
18 genetic architecture of ten antler traits and their principle components using genomic data  
19 from >38,000 SNPs. We estimate the heritabilities and genetic correlations of the antler  
20 traits using a genomic relatedness approach. We then use genome-wide association and  
21 haplotype-based regional heritability to identify regions of the genome underlying antler  
22 morphology, and an Empirical Bayes approach to estimate the underlying distributions of

allele effect sizes. We show that antler morphology is heritable with a polygenic architecture, highly repeatable over an individual's lifetime, and that almost all aspects are positively genetically correlated with some loci identified as having pleiotropic effects. Our findings suggest that a large mutational target and pleiotropy with traits sharing similar complex polygenic architectures are likely to contribute to the maintenance of genetic variation in antler morphology in this population.

## 29 Introduction

Sexually-selected traits show a great variety and complexity across the animal kingdom, ranging from traits and behaviours that increase attractiveness, to those which increase intra-sexual competitiveness for access to mates (Andersson, 1994). Sexual traits are typically under strong selection (Kingsolver *et al.*, 2001), with phenotypic differences between related species suggesting that they can evolve rapidly, with downstream consequences for other phenomena such as adaptation, speciation and extinction probability (Lorch *et al.*, 2003; Ritchie, 2007; Servedio & Bürger, 2014; Wilkinson *et al.*, 2015; Martínez-Ruiz & Knell, 2017). Theory predicts that such strong sexual selection will reduce genetic variation within populations, yet empirical studies often show that sexual traits have substantial underlying genetic variation despite evidence of selection (Pomiankowski & Moller, 1995; Kotiaho *et al.*, 2001; Kruuk *et al.*, 2002; Svensson & Gosden, 2007). This contradiction presents an evolutionary paradox, for which several explanations have been proposed. These include differences in selection between the sexes, developmental stages or environmental conditions (Bourret *et al.*, 2017; Barson *et al.*, 2015), phenotypic plasticity (Charmantier & Gienapp, 2014), condition dependence (Dugand *et al.*, 2019) and trade-offs with survival (Johnston *et al.*, 2013). In addition, these observations could be due to genetic correlations with traits under opposing selection gradients and linkage disequilibrium between causal loci and deleterious alleles (Lande, 1982; Lande & Arnold, 1983; Connallon & Hall, 2018). Quantitative genetic studies have provided some insight into these different explanations, through estimating the relative contributions of additive genetic (i.e. the heritability,  $h^2$ ) and environmental effects to phenotypic variance, as well as examining phenotypic and genetic correlations

52 with other traits, including fitness (Emlen, 1994; Griffith *et al.*, 1999; Kruuk *et al.*, 2002;  
53 Robinson *et al.*, 2006). However, a key limitation of most studies to date is that the genetic  
54 architecture of sexual traits is generally unknown - that is, the underlying loci, their  
55 number, distribution and relative effect sizes, and the extent of pleiotropy, epistasis and  
56 other interactions (Timpson *et al.*, 2018; Chenoweth & McGuigan, 2010). By identifying  
57 the genetic architecture of sexual traits, we can better understand the underlying  
58 molecular mechanisms and evolutionary processes that drive their variation (Dobzhansky,  
59 1971; Lewontin *et al.*, 1974; Kuijper *et al.*, 2012; Wilkinson *et al.*, 2015).

60 Recent genomic advances in natural populations have led to a number of studies  
61 characterising genetic architectures using genome-wide association studies (GWAS,  
62 reviewed in Santure & Garant 2018). Yet, relatively few studies exist for sexually selected  
63 traits, with much of the focus on discrete traits with Mendelian or relatively simple genetic  
64 architectures (Johnston *et al.*, 2011; Barson *et al.*, 2015; Hendrickx *et al.*, 2021). In these  
65 rare cases, mapping specific genomic variants associated with sexual trait variation can  
66 allow investigation of sex, age and environment-specific effects at individual loci. As such,  
67 they have revealed compelling cases of heterozygote advantage due to trade-offs  
68 between reproductive success and survival (Johnston *et al.*, 2013), or due to differences  
69 in optimal trait expression between the sexes (Barson *et al.*, 2015). However in most  
70 cases, sexual traits are likely to have oligogenic or polygenic architectures (i.e. moderate  
71 to large numbers of underlying loci), particularly in cases where they are condition  
72 dependent (Rowe & Houle, 1996). One issue is that as the number of loci increase and  
73 their relative effect sizes decrease, it becomes more difficult to implicate individual loci in  
74 trait variation; for example, in heights of people of European ancestry, only a fraction of  
75 the loci underpinning variation has been identified (Yengo *et al.*, 2018). On the other  
76 hand, being able to determine that a trait has a polygenic architecture can still shed light  
77 on how sexual traits evolve for the following reasons. First, polygenic traits present a large  
78 mutational target, contributing to the maintenance of genetic variance via the introduction  
79 of new variants (Rowe & Houle, 1996). Second, selection induced allele frequency  
80 changes at a great number of loci is expected to result in a rapid change in trait mean,  
81 and thus trait evolution, which is sustained by the aforementioned large mutational input,  
82 leaving the distribution of genetic effects unperturbed (Barton *et al.*, 2017; Sella & Barton,

2019). Third, pleiotropy and/or linkage between loci could maintain variation through conflicts between traits sharing a similar or linked polygenic architecture (Ruzicka *et al.*, 2019). Therefore, studies of sexual traits should aim to identify specific genetic variants with large effects on phenotype, and should also aim also to determine the distribution of polygenic effect sizes and the degree to which these underlying loci are shared between traits. This will not only shed light on potential evolutionary processes and mechanisms in empirical studies, but will also inform the mechanistic details of theoretical models to allow better assumptions to account for the complexities of natural populations (McNamara & Houston, 2009; Wilkinson *et al.*, 2015).

Antlers are a form of sexual weaponry in deer (Cervidae) that are generally only present in males and are shed and regrown annually (Davis *et al.*, 2011). They are used as weaponry in intra-male competition for access to females, with larger antlers often associated with increased reproductive success (Kruuk *et al.*, 2002; Malo *et al.*, 2005), yet antler weights and dimensions are often moderately heritable in both wild and captive populations (Lukefahr & Jacobson, 1998; Williams *et al.*, 1994; Wang *et al.*, 1999; Van Den Berg & Garrick, 1997; Kruuk *et al.*, 2002, 2014; Jamieson *et al.*, 2020). In male red deer (*Cervus elaphus*) on the island of Rum, Scotland, there is directional selection for increased antler weight and number of points (known as “form”), yet both are substantially heritable ( $h^2 = 0.38$  &  $0.24$ , respectively) with no phenotypic response to selection observed over a 30 year study period (Kruuk *et al.*, 2002, 2014). Whilst both antler weight and form are positively genetically correlated, the selection gradients on the genetic components were estimated as zero and negative, respectively (Kruuk *et al.*, 2002, 2014). This suggested that selection for antler weight is environmentally driven, whereas negative selection on antler form is constrained by genetic associations with a trait that is genetically unresponsive to selection, meaning that genetic constraints may contribute to the maintenance of genetic variance. Alternatively, the association with breeding success may be driven by indirect correlations with environmental variables (Kruuk *et al.*, 2014). To better understand the mechanisms constraining selection, a logical next step is to determine the genetic architecture of antler morphology. As antlers present a multi-dimensional phenotype, adding more information from different measures may contribute to understanding potential evolutionary conflict and constraints within the antler

114 and to characterise the specific genetic variants underpinning heritable variation  
115 (Chenoweth & McGuigan, 2010).

116 In this study, we used an extensive antler morphology data set with 948 to 3972  
117 observations in 336 to 891 unique males and genomic data from 38,000 polymorphic  
118 SNPs to estimate the heritability and genetic correlations of ten antler traits using  
119 genomic relatedness matrices. We then use genome-wide association and  
120 haplotype-based regional heritability to identify regions of the genome underlying antler  
121 morphology, and an Empirical Bayes approach to estimate the underlying distributions of  
122 allele effect sizes. We show that antler morphology is heritable with a polygenic  
123 architecture, and that almost all aspects are positively genetically correlated with some  
124 loci identified as having pleiotropic effects. Our findings suggest that genetic variation in  
125 antler morphology is maintained via a large mutational target and pleiotropy with traits  
126 sharing similar complex polygenic architectures in the red deer population.

# 127 **Methods**

## 128 **Study system**

129 The red deer study population is situated in the North Block of the Isle of Rum, Scotland  
 130 (57°02'N, 6°20'W) and has been subject to individual monitoring since 1971  
 131 (Clutton-Brock *et al.*, 1982). Deer calves are marked with ear tags shortly after birth to  
 132 enable recording of detailed life histories of individuals. DNA is routinely extracted from  
 133 neonatal ear punches, post-mortem tissue and/or cast antlers (see Huisman *et al.* 2016).  
 134 A pedigree of 4,515 individuals is available for the population, and was previously  
 135 constructed using single nucleotide polymorphism (SNP) data in the R package Sequoia  
 136 (Huisman, 2017). Research was conducted following approval of the University of  
 137 Edinburgh's Animal Welfare and Ethical Review Body and under appropriate UK Home  
 138 Office licenses.

## 139 **Antler measures**

140 Male red deer cast and regrow their antlers every year from the age of one or two (Kruuk  
 141 *et al.*, 2002). Ten antler measures are routinely taken from cast antlers and antlers from  
 142 deceased individuals between 1971 and 2017 (see Figure 1 and Table 1 for full details  
 143 and sample sizes of each measure). All measures of length were taken following the curve  
 144 of the antler, and measures of circumference were taken at the narrowest point between  
 145 antler tines (points). Total antler length was defined as the distance from the coronet (base)  
 146 to the furthest point of the antler. All length and circumference measures were taken in  
 147 centimetres. Antler weight was measured as the total dry mass of the antler in grams.  
 148 Antler form was defined as the number of tines, and as this trait can be determined visually  
 149 on living deer, was determined from observations in the field and therefore has the greatest  
 150 sample size (3972 observations from 891 stags). Where measurements from both the  
 151 left and right antlers were available, the mean was taken. Individual measurements were  
 152 excluded if the antler part was broken and antler weight was discarded if any part of the  
 153 antler was broken. Only antlers from stags aged 3 years or older were considered, as cast

154 antlers recovered in the field can be reliably assigned to known individuals by their shape  
155 from this age onwards (Kruuk *et al.*, 2002, 2014).

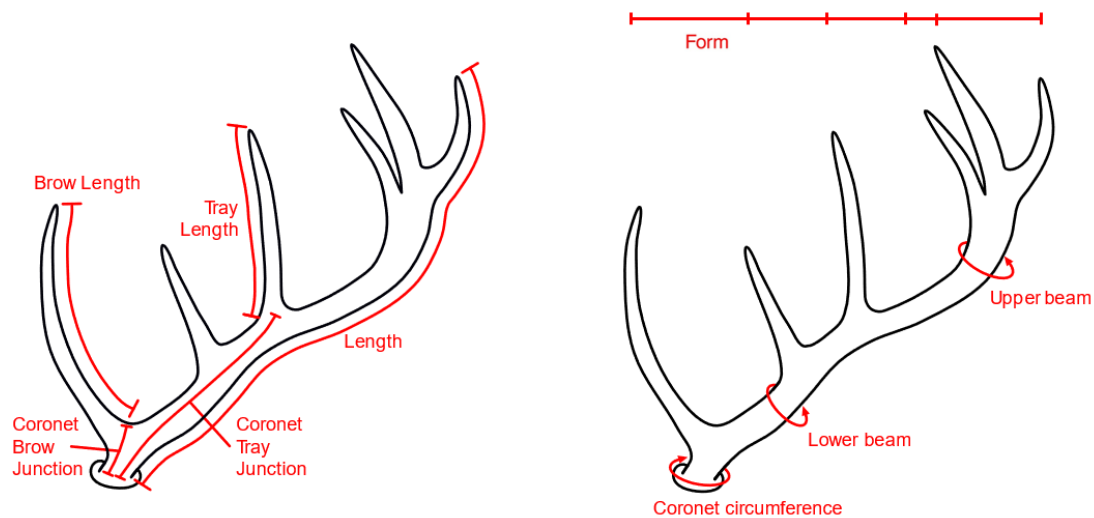

**Figure 1:** A schematic of the antler measures used in this study (measured in *cm*). Antler weight was also measured in *g*. Further details for each measurement are given in the main text and in Table 1.

156

**Table 1:** Summary statistics of all 10 antler measures as shown in Figure 1 in SNP genotyped males. *N Obs* is the number of observations, *N IDs* is the number of unique individuals for each measure. All lengths and circumferences were measured in *cm*, weight was measured in *g*. *SD* denotes the standard deviation.

| Trait                         | N Obs | N IDs | Mean    | SD      |
|-------------------------------|-------|-------|---------|---------|
| Antler Length                 | 1060  | 444   | 65.168  | 12.029  |
| Coronet Circumference         | 1224  | 471   | 15.626  | 2.013   |
| Lower Beam Circumference      | 1204  | 460   | 10.504  | 1.533   |
| Upper Beam Circumference      | 1123  | 436   | 9.446   | 1.358   |
| Coronet-Brow Junction         | 1162  | 466   | 5.720   | 1.025   |
| Coronet-Tray Junction         | 1184  | 455   | 27.313  | 5.398   |
| Brow Length                   | 1139  | 457   | 20.568  | 5.461   |
| Tray Length                   | 948   | 388   | 14.484  | 4.177   |
| Antler Weight                 | 1003  | 336   | 649.858 | 243.098 |
| Form (Total Number of Points) | 3972  | 891   | 4.498   | 1.072   |

## 157 Genomic data-set

158 DNA samples from 2,870 individuals have been genotyped at 51,248 SNP markers  
159 (Huisman *et al.*, 2016) on the Cervine Illumina BeadChip (Brauning *et al.*, 2015) using an  
160 Illumina genotyping platform and Illumina GenomeStudio software (Illumina Inc., San  
161 Diego, CA, USA). All SNPs on the Cervine Illumina BeadChip are named based on their  
162 synteny with the cattle genome BTA vUMD 3.0 (e.g. SNP ID *cela1\_red\_15\_1479373* is  
163 orthologous to position 1479373 on cattle chromosome 15). In addition, a linkage map  
164 specific to the Rum population is available, with 38,083 SNPs assigned to linkage groups  
165 corresponding to the 33 deer autosomes and X chromosome (Johnston *et al.*, 2017).  
166 Quality control was carried out in PLINK v1.9 (Chang *et al.*, 2015) with the following  
167 thresholds: SNP genotyping success >0.99, minor allele frequency >0.01 and individual  
168 genotyping success >0.99. Further quality control of mapped SNPs and X-linked markers  
169 (i.e heterozygous state in males) was conducted using the *check.marker* function with



170 default thresholds in the R library GenABEL v1.80 in R v3.4.2 (Aulchenko *et al.*, 2007).  
 171 The final SNP dataset consisted of 2,138 individuals and 38,006 markers. Genome-wide  
 172 linkage disequilibrium (LD) was calculated between all SNPs within 1Mb of each other  
 173 using Spearman's Rank correlation ( $\rho$ ). Based on a linear regression of  $\rho$  on the log base  
 174 pair distance between SNPs, LD decayed at a relatively low rate of 0.031  $\rho$  per Mb (SE =  
 175  $5.56 \times 10^{-4}$ , Figure S1).

## 176 Principal components of antler measures

177 A principal component analysis (PCA) was conducted to create a second dataset  
 178 combining information from the different antler measures, while also increasing the  
 179 differentiation among the different principal components (PCs). As PCA does not allow for  
 180 missing data, we imputed missing antler measures using the Bayesian *bpca* algorithm in  
 181 the packages *pcaMethods* v1.7 in R v3.4.2 (Stacklies & Redestig, 2018; Oba *et al.*, 2003).  
 182 We used the default settings which assumes a flat prior distribution for imputation, and the  
 183 most appropriate number of PCs was determined using the *kEstimate* function. To  
 184 improve imputation accuracy, the form was split into the number of tines on the lower  
 185 beam and upper beam, respectively, resulting in 11 antler measures. Imputation accuracy  
 186 was quantified by calculating the error of prediction ( $E$ ) from a complete subset of the  
 187 data with no missing values and the same subset with randomly missing data at a similar  
 188 level to the whole data set ( $\sim 9\%$ ). The error of prediction was calculated as follows:

$$E = \sum (V - I)^2 / \sum (V)^2 \quad (1)$$

189 where  $I$  refers to the imputed values of the data subset with missing values and  $V$  to  
 190 their counterpart in the complete data subset (Stacklies & Redestig, 2018). Our analysis  
 191 found that the imputation of missing values using a Bayesian PCA approach achieved high  
 192 accuracy ( $E = 0.015$ ). To account for variation among antlers due to age structure, antler  
 193 measure values were modelled using a linear model approach (following Pallares *et al.*  
 194 2014). All models had the same structure:

$$y = Age + Age^2 + e \quad (2)$$

195 where  $y$  is a vector of the antler measure and  $e$  is a residual error term. Age effects were  
 196 fitted as a fixed quadratic term to account for the non-linear change in antler measures  
 197 with age (see also Nussey *et al.* 2009 and Kruuk *et al.* 2002). All antler measures were  
 198 modelled using a Gaussian distribution. All models were fitted using the *lm* function in R  
 199 v3.4.2. The residuals of these models were then used in a standard PCA using the *prcomp*  
 200 function in R and the scores of the PCs used as trait values in the downstream analysis.

## 201 **Estimating heritability using the animal model**

202 All antler measures and PCs were modelled using a restricted maximum-likelihood  
 203 (REML) approach within the mixed ‘animal model’ framework (Henderson, 1975) in  
 204 ASREML-R v4.0 (Butler *et al.*, 2009) in R v3.4.2. The animal model estimates the effect  
 205 sizes of fixed effects and partitions phenotypic variance ( $V_P$ ) into several random effects,  
 206 including the variance attributed to additive genetic effects ( $V_A$ ). Previous studies have  
 207 estimated  $V_A$  using a pedigree relatedness matrix (Kruuk *et al.*, 2002, 2014); here, we  
 208 wished to compare estimates of  $V_A$  using both pedigree and genomic relatedness  
 209 information. Therefore, all models were carried out estimating  $V_A$  in one of two ways: 1)  
 210 using a numerator relationship matrix  $A$  based on the pedigree, using the *ainv* function in  
 211 ASReml-R; and 2) using a genomic relatedness matrix (GRM) calculated using  
 212 autosomal SNPs ( $N = 37,271$ ) in the *--make-grm* function in GCTA v1.24.3 (Yang *et al.*,  
 213 2011a). The GRM was adjusted to assume similar frequency spectra of genotyped and  
 214 causal loci with the argument *--grm-adj 0*.

215 All 10 antler measures and 11 PCs were modelled in univariate animal models with the  
 216 following structure:

$$y = X\beta + Z_1a + Z_ru_r + e \quad (3)$$

217 where  $y$  is a vector of the antler measure or PC,  $X$  is an incidence matrix relating  
 218 individual measures to the vector of fixed effects  $\beta$ ;  $Z_1$  and  $Z_r$  are incidence matrices  
 219 relating individual measures to additive genetic and other random effects respectively;  $a$  is  
 220 a vector of relatedness matrix  $A$  or GRM;  $u_r$  is a vector of additional random effects; and  $e$   
 221 is a vector of residual effects. Fixed effects included age in years as both a linear and

quadratic term for the antler measures and an intercept only for the PC models (as age structure was accounted for prior to PC estimation). Random effects included: the additive genetic effect; permanent environment (i.e. individual identity) to account for pseudoreplication due to repeated measures in the same individual; and birth year and year of antler growth to account for common environmental effects between individuals. The narrow sense heritability ( $h^2$ ) was calculated as  $V_A/V_P$ , where  $V_P$  was defined as the sum of the variance attributed to all random effects, including the residual variance (Falconer & Mackay, 1996). The significance of fixed effects was calculated with a Wald test, while the significance of the random effects was tested using a likelihood ratio test (LRT) between models with and without random effect of interest (i.e.  $2 \times$  the difference between the model log-likelihoods, assuming a  $\chi^2$  distribution with 1 degree of freedom).

Bivariate models were run to determine genetic correlations between the 10 antler measures, with the following structure:

$$\begin{bmatrix} y_1 \\ y_2 \end{bmatrix} = \begin{bmatrix} X_1 & 0 \\ 0 & X_2 \end{bmatrix} \begin{bmatrix} \beta_1 \\ \beta_2 \end{bmatrix} + \begin{bmatrix} Z_1 & 0 \\ 0 & Z_2 \end{bmatrix} \begin{bmatrix} a_{a1} \\ a_{a2} \end{bmatrix} + \begin{bmatrix} Z_{r1} & 0 \\ 0 & Z_{r2} \end{bmatrix} \begin{bmatrix} u_{r1} \\ u_{r2} \end{bmatrix} + \begin{bmatrix} e_1 \\ e_2 \end{bmatrix} \quad (4)$$

All variables are as defined in equation (3), with subscripts referring to antler traits 1 and 2, respectively. The GRM was used to model the additive genetic covariance. The genetic correlation  $r^2$  can be obtained from the genetic covariance, as  $r_a = cov_a(1, 2)/\sigma_1\sigma_2$ , where  $cov_a(1, 2)$  stands for the covariance between trait 1 and 2, and  $\sigma$  represents the respective standard deviations for traits 1 and 2. The significance of  $r_a$  was determined using an LRT as above, by comparing the model to another where  $r_a$  was constrained to either zero or one.

## Genome-wide association studies

Genome-wide association studies (GWAS) were conducted in RepeatABEL v1.1 (Rönnegård *et al.*, 2016) implemented in R v3.4.2. First, the *prefitModel* function was used to fit a linear mixed model (without fixed SNP effects), specifying the same fixed and random effect structure as Equation 3. The resulting covariance matrix of the random

effects was then input to the *rGLS* function, which fits each SNP genotype as an additive linear covariate. This approach accounts for population structure by fitting the GRM as a random effect and allows for repeated measures per individual. The significance of each SNP was determined using Wald tests, distributed as  $\chi^2$  with 1 degree of freedom. These statistics were corrected for potential inflation due to population structure not captured by the GRM by dividing them by the genomic inflation factor  $\lambda$ , defined as the observed median  $\chi^2$  statistic divided by the null expectation median  $\chi^2$  statistic (Devlin & Roeder, 1999). This was done separately for each antler measure. After correction, the genome-wide significance threshold was set to a p-value of  $1.42 \times 10^{-6}$ , equivalent to  $\alpha = 0.05$  after correcting for multiple-testing and accounting for non-independence due to LD between SNP markers (see Johnston *et al.* 2018).

## Regional heritability analysis

In addition to GWAS, we used a regional heritability approach to identify regions of the genome associated with antler trait variation. This method uses information from multiple loci to determine the proportion of  $V_P$  explained by defined genomic regions, and has increased power to detect variants of small effect sizes and low minor allele frequencies (Yang *et al.*, 2011b; Nagamine *et al.*, 2012). Regions were defined using a 'sliding window' approach with SNPs of known position on the Rum deer linkage map (Johnston *et al.*, 2017). Each window was 20 SNPs wide and overlapped the preceding window by 10 SNPs. If the last window in the linkage group contained less than 20 SNPs, the last 20 SNPs of that linkage group were taken instead. SNPs in linkage group 34, which corresponding to the X chromosome, were excluded from this analysis, as models using X-linked markers did not converge. This resulted in a total of 3,608 genomic windows. The contribution of each genomic region to  $V_A$  and  $V_P$  for each antler measure and PC was modelled as follows:

$$y = X\beta + Z_1(a - v_i) + Z_2v_i + Z_ru_r + e \quad (5)$$

with variables defined as in Equation (3), but with the additive genetic components split into two terms:  $Z_1(a - v_i)$  and  $Z_2v_i$ , where  $Z_1$  is an incidence matrix of the GRM

constructed based on all autosomal SNPs excluding those in window  $i$ ,  $(a - v_i)$  is the additive genetic effect excluding the window  $i$ ;  $Z_2$  is an incidence matrix of the GRM constructed with only the SNPs in window  $i$  and  $v_i$  is the additive genetic effect of the window  $i$ . The significance of an association between a window  $i$  and an antler trait was determined using a LRT comparing models containing and omitting the term  $Z_2 v_i$ . The distribution of  $\chi^2$  statistics from the LRTs across all windows was corrected using the genomic control parameter  $\lambda$ , calculated using the same approach as above (Devlin & Roeder, 1999). A genome-wide significance threshold was calculated using a Bonferroni correction, where the  $\alpha$  significance level (here 0.05) was divided by the number of effective tests. For this, we divided the number of windows by two to account for the overlap of half the number of total SNPs within each window, resulting in a significance threshold of  $P = 2.77 \times 10^{-5}$ .

## 286 Estimation of SNP effect size distribution

We investigated the distribution of allele effect sizes and false discovery rates for all antler measures and PCs using the *ash* function in the R package *ashR* v2.2-32 (Stephens, 2016). This uses “adaptive shrinkage”, an Empirical Bayes method that uses the slopes and standard errors of the additive SNP effects from the GWAS models above to compute a posterior distribution of SNP effect sizes across all loci. This approach estimates the local false discovery rate (*lfdr*), which is the probability that the SNP effect is zero. The significance of a SNP effect was then determined by a local false sign rate (*lfsr*), defined as the probability of making an error when assigning a sign (positive or negative) to an effect, with a cut-off at  $\alpha = 0.05$ . The prior distribution was specified to be any symmetric unimodal distribution when applying the *lfdr* estimation.

We then re-estimated the effect sizes of SNPs with the highest non-zero effects using adaptive shrinkage using the animal model framework (Equation 3) in ASREML-R v4.0 (Butler *et al.*, 2009). A maximum number of 10 SNPs per trait were taken. SNP genotype was fit as a two or three level factor and significance was tested using a Wald test. Fitting SNP genotype as a factor allowed the quantification of both the dominance deviation and

the variance co-variance structure of the genotypes, which are needed to estimate the variance attributed to each SNP, calculated as follows (Falconer & Mackay, 1996):

$$V_{SNP} = 2pq(a + d(q - p))^2 \quad (6)$$

where  $p$  and  $q$  are the allele frequencies of alleles  $A$  and  $B$ , respectively;  $a$  is the additive genetic effect defined as the mid-point between the effect sizes of the genotypes  $AA$  and  $BB$ ; and  $d$  is the dominance deviation defined as the difference between  $a$  and the effect size of the heterozygote  $AB$ . The proportion of  $V_A$  attributed to a SNP was calculated as the ratio of  $V_{SNP}$  to the sum of  $V_{SNP}$  and the  $V_A$  obtained from an animal model where the SNP effect was omitted. Standard errors of  $V_{SNP}$  were estimated using the *deltamethod* function in the R library *msm* v1.6.7 (Jackson, 2011) in R v3.4.2.

## Data Accessibility Statement

Data for this study will be archived in a public repository upon manuscript acceptance. All results and data underlying the figures in this manuscript are provided as Supplementary Material. All scripts for the analysis are provided at [https://github.com/Lucy-Peters/Red\\_deer\\_antler\\_genetic\\_architecture](https://github.com/Lucy-Peters/Red_deer_antler_genetic_architecture).

## 316 Results

### 317 Principal component analysis of antler measures

318 A principal component analysis (PCA) of 11 antler measures resulted in the maximum  
 319 number of principal components (i.e. 11 PCs). The composition of the PCs showed that  
 320 PC1, which explained around 41% of the variance, combined approximately equal amounts  
 321 of information from all 11 measures, while PCs 2 to 11 explained increasingly less variance,  
 322 mostly representing one or two antler measures (Figure 2).

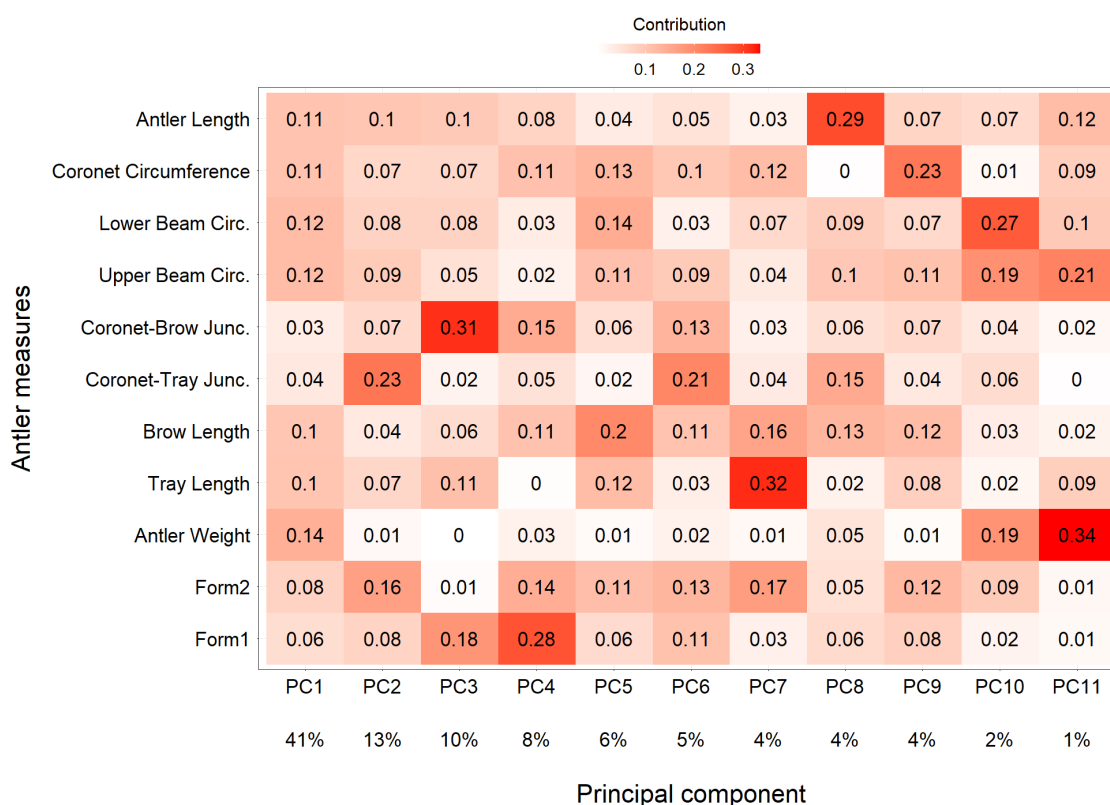

**Figure 2:** Heat-map showing the contribution (as a proportion) of each antler measurement to each of the 11 principal components.

### 323 **Animal models of antler measures.**

324 Antler measures were significantly heritable, with estimates ranging from  $h^2 = 0.211$  to  
 325 0.436 for the pedigree estimates, and  $h^2 = 0.229$  to 0.414 for the genomic estimates  
 326 (Figure 3; Tables 2 & S1). Heritability estimates for antler weight, antler length, coronet  
 327 circumference, brow length and form were generally consistent with previous findings by  
 328 Kruuk *et al.* (2014, Figure 3). All antler PCs were also significantly heritable, although  
 329 estimates decreased substantially for higher order PCs, which explained relatively small  
 330 proportions of variance in antler morphology (Figure S2, Table S2). For all antler  
 331 measures and PCs, confidence intervals between pedigree and genomic relatedness  
 332 estimates were highly similar; there was no trend when comparing estimates of  $h^2$  for the  
 333 same trait, suggesting that both the pedigree and genomic relatedness matrices capture  
 334 the additive genetic variance to a similar degree in this population. Therefore, all results  
 335 described from this point onwards are from models fitting a GRM, unless otherwise  
 336 stated.

337 The permanent environmental effect (which includes dominance and epistatic effects)  
 338 was generally significant for all antler measures, explaining up to 28.0% (upper beam  
 339 circumference) of the phenotypic variance (Table 2). Year of antler growth explained a  
 340 significant proportion of phenotypic variance for most antler measures and PCs (Tables 2  
 341 and S2, respectively). Conversely, birth year was not significant for any antler measure or  
 342 PC; nevertheless, we retained this random effect in all models to account for potential  
 343 cohort effects (Tables 2 & S2). Trait repeatabilities, calculated as the sum of contributions  
 344 from the additive genetic, the permanent environment and birth year components, was  
 345 high for all antler measures, ranging from 38.5% (antler length) to 66.1% (tray length;  
 346 Table 2). Age as both linear and quadratic fixed effect terms was significantly associated  
 347 with all antler measures (Table S3).



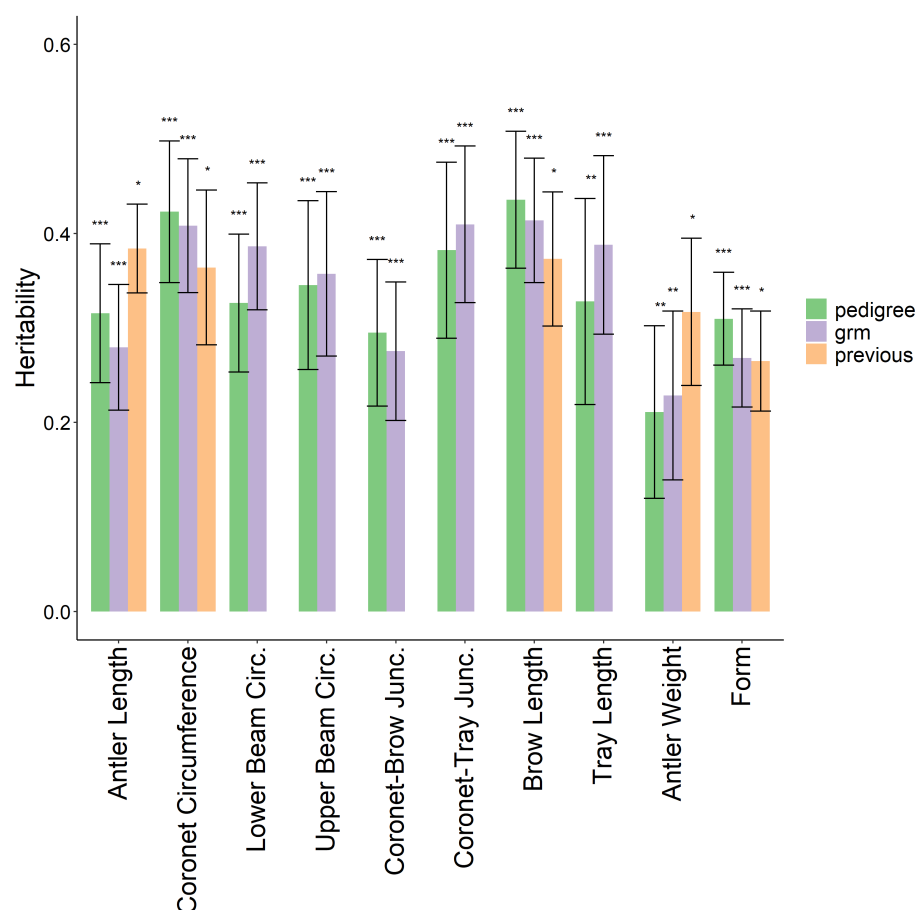

**Figure 3:** Heritability estimates for all 10 antler measures. Both estimates from the pedigree and the GRM models are shown as well as results from a previous study by Kruuk *et al.* (2014) for antler weight and form. \* $P \leq 0.05$ , \*\* $P \leq 0.01$  and \*\*\* $P \leq 0.001$ . Underlying data is provided in Table S1

**Table 2:** Proportions of phenotypic variance ( $V_P$ ) explained by random effects in animal models of the ten antler measures. The additive genetic effect was estimated using the GRM. Standard errors are given in brackets. Information on sample sizes and mean measures is provided in Table 1.

| Trait              | $V_P$     | Additive Genetic | Permanent Environment | Birth Year             | Growth Year      | Residual         | Repeatability |
|--------------------|-----------|------------------|-----------------------|------------------------|------------------|------------------|---------------|
| Antler Length      | 61.155    | 0.279<br>(0.066) | 0.105<br>(0.058)      | 1.04E-08<br>(0.014)    | 0.222<br>(0.047) | 0.393<br>(0.035) | 0.385         |
| Coronet Circ.      | 3.047     | 0.408<br>(0.071) | 0.128<br>(0.056)      | 0.018<br>(0.018)       | 0.243<br>(0.047) | 0.203<br>(0.020) | 0.554         |
| Lower Beam Circ.   | 1.323     | 0.386<br>(0.067) | 0.096<br>(0.054)      | 2.22E-07<br>(1.64E-08) | 0.211<br>(0.042) | 0.307<br>(0.027) | 0.483         |
| Upper Beam Circ.   | 1.084     | 0.357<br>(0.087) | 0.280<br>(0.081)      | 5.16E-08<br>(0.017)    | 0.164<br>(0.035) | 0.199<br>(0.018) | 0.637         |
| Coronet-Brow Junc. | 0.872     | 0.275<br>(0.073) | 0.254<br>(0.068)      | 0.026<br>(0.022)       | 0.152<br>(0.037) | 0.292<br>(0.025) | 0.555         |
| Coronet-Tray Junc. | 20.930    | 0.410<br>(0.083) | 0.148<br>(0.072)      | 0.001<br>(0.016)       | 0.019<br>(0.009) | 0.422<br>(0.032) | 0.559         |
| Brow Length        | 21.555    | 0.414<br>(0.066) | 0.068<br>(0.050)      | 6.33E-09<br>(0.013)    | 0.269<br>(0.050) | 0.250<br>(0.025) | 0.481         |
| Tray Length        | 13.809    | 0.388<br>(0.094) | 0.273<br>(0.088)      | 7.65E-08<br>(5.34E-09) | 0.028<br>(0.012) | 0.311<br>(0.028) | 0.661         |
| Antler Weight      | 30727.710 | 0.229<br>(0.089) | 0.263<br>(0.086)      | 0.023<br>(0.027)       | 0.252<br>(0.050) | 0.233<br>(0.025) | 0.514         |
| Form               | 0.907     | 0.268<br>(0.052) | 0.249<br>(0.046)      | 0.024<br>(0.015)       | 0.044<br>(0.011) | 0.416<br>(0.019) | 0.541         |

## 348 Genetic correlations between antler measures

349 Most antler measures were positively genetically correlated, suggesting some degree of  
 350 shared genetic architecture (Table 3). This was also reflected in the disproportionate  
 351 contribution of all antler measures to PC1 (Figure 2). Antler weight was significantly  
 352 positively correlated with almost all other measures (with the exception of coronet-tray  
 353 junction), ranging from  $r^2 = 0.40$  for coronet-brow junction to  $r^2 = 0.94$  for upper beam  
 354 circumference. The only significant negative genetic correlations were observed between  
 355 coronet-tray junction and tray length, form and lower beam circumference (Table 3).

## 356 Genome-wide and regional heritability studies

357 No genomic regions were significantly associated with any antler measure or PC using  
 358 GWAS (Figures 4 and S3, and Tables S4 and S5, respectively). The regional heritability  
 359 analysis found no regions of the genome significantly associated with any antler measure  
 360 or PC (Figures 5 and S4, and tables S6 and S7, respectively), with the exception of PC9,  
 361 which was significantly associated with three overlapping windows (corresponding to a  
 362  $\sim 4.4$  Mb region) on CEL linkage group 21. The most significantly associated window  
 363 explained 16.8% (SE = 8.0%) of the phenotypic variance and 66.3% (SE = 22.0%) of the  
 364 additive genetic variance. However, PC9 accounts for only 4% of overall phenotypic  
 365 variance among all antler measures (see Figure 2). Homology with the cattle genome  
 366 (version ARS-UCD1.2) suggested that there are a total of 19 coding regions within the  
 367 region covered by all three significant windows, Details of SNPs within this region can be  
 368 found in Table S8 and associated GO terms can be found in Table S9.

**Table 3:** Genetic correlations among all 10 antler measurements. Standard errors are given in brackets,  $*P \leq 0.05$ ,  $**P \leq 0.01$  and  $***P \leq 0.001$ . AL = Antler Length, CC = Coronet Circumference, LBC = Lower Beam Circumference, UBC = Upper Beam Circumference, CBJ = Coronet-Beam Junction, CTJ = Coronet-Tray Junction, BL = Brow Length, TL = Tray Length, AW = Antler Weight, F = Form.

|     | CC                      | LBC                     | UBC                     | CBJ                     | CTJ                      | BL                       | TL                       | AW                      | F                        |
|-----|-------------------------|-------------------------|-------------------------|-------------------------|--------------------------|--------------------------|--------------------------|-------------------------|--------------------------|
| AL  | 0.678<br>(0.068)<br>*** | 0.640<br>(0.077)<br>*** | 0.664<br>(0.093)<br>*** | 0.674<br>(0.103)<br>*** | 0.665<br>(0.096)<br>***  | 0.549<br>(0.075)<br>***  | 0.447<br>(0.109)<br>***  | 0.854<br>(0.063)<br>*** | 0.406<br>(0.108)<br>***  |
| CC  | —                       | 0.800<br>(0.054)<br>*** | 0.745<br>(0.084)<br>*** | 0.168<br>(0.109)<br>*** | 0.369<br>(0.089)<br>***  | 0.650<br>(0.067)<br>***  | 0.603<br>(0.088)<br>***  | 0.913<br>(0.065)<br>*** | 0.565<br>(0.095)<br>***  |
| LBC | —                       | —                       | 0.940<br>(0.024)<br>*** | 0.442<br>(0.102)<br>*** | -0.322<br>(0.091)<br>*** | 0.592<br>(0.068)<br>***  | 0.810<br>(0.059)<br>***  | 0.928<br>(0.059)<br>*** | 0.780<br>(0.064)<br>***  |
| UBC | —                       | —                       | —                       | 0.266<br>(0.132)<br>*   | -0.179<br>(0.112)<br>*** | 0.541<br>(0.073)<br>***  | 0.733<br>(0.069)<br>***  | 0.943<br>(0.059)<br>*** | 0.902<br>(0.041)<br>***  |
| CBJ | —                       | —                       | —                       | —                       | 0.492<br>(0.108)<br>***  | -0.079<br>(0.109)<br>*** | -0.006<br>(0.137)<br>*** | 0.396<br>(0.185)<br>*   | -0.163<br>(0.126)<br>*** |
| CTJ | —                       | —                       | —                       | —                       | —                        | 0.055<br>(0.065)<br>***  | -0.713<br>(0.073)<br>*** | 0.188<br>(0.146)<br>*** | -0.521<br>(0.099)<br>*** |
| BL  | —                       | —                       | —                       | —                       | —                        | —                        | 0.739<br>(0.070)<br>***  | 0.710<br>(0.073)<br>*** | 0.608<br>(0.065)<br>***  |
| TL  | —                       | —                       | —                       | —                       | —                        | —                        | —                        | 0.811<br>(0.082)<br>*** | 0.822<br>(0.064)<br>***  |
| AW  | —                       | —                       | —                       | —                       | —                        | —                        | —                        | —                       | 0.890<br>(0.061)<br>***  |

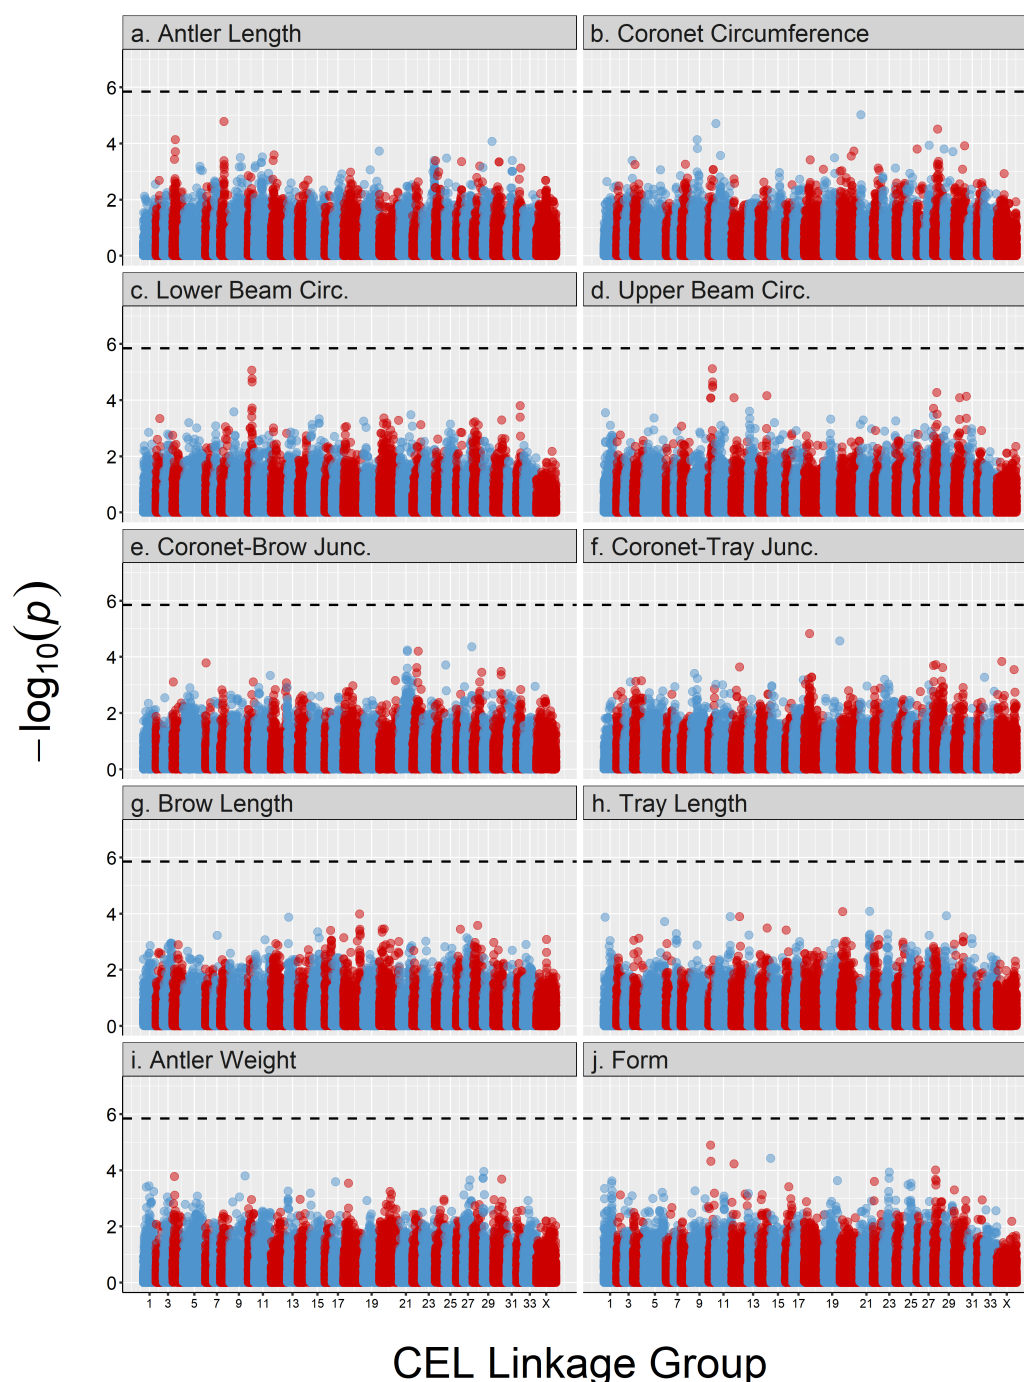

**Figure 4:** Genome-wide association study for antler measures. The dashed line indicates the significance threshold equivalent to  $\alpha = 0.05$ . Points are colour-coded by chromosome. Underlying data is provided in Table S4.

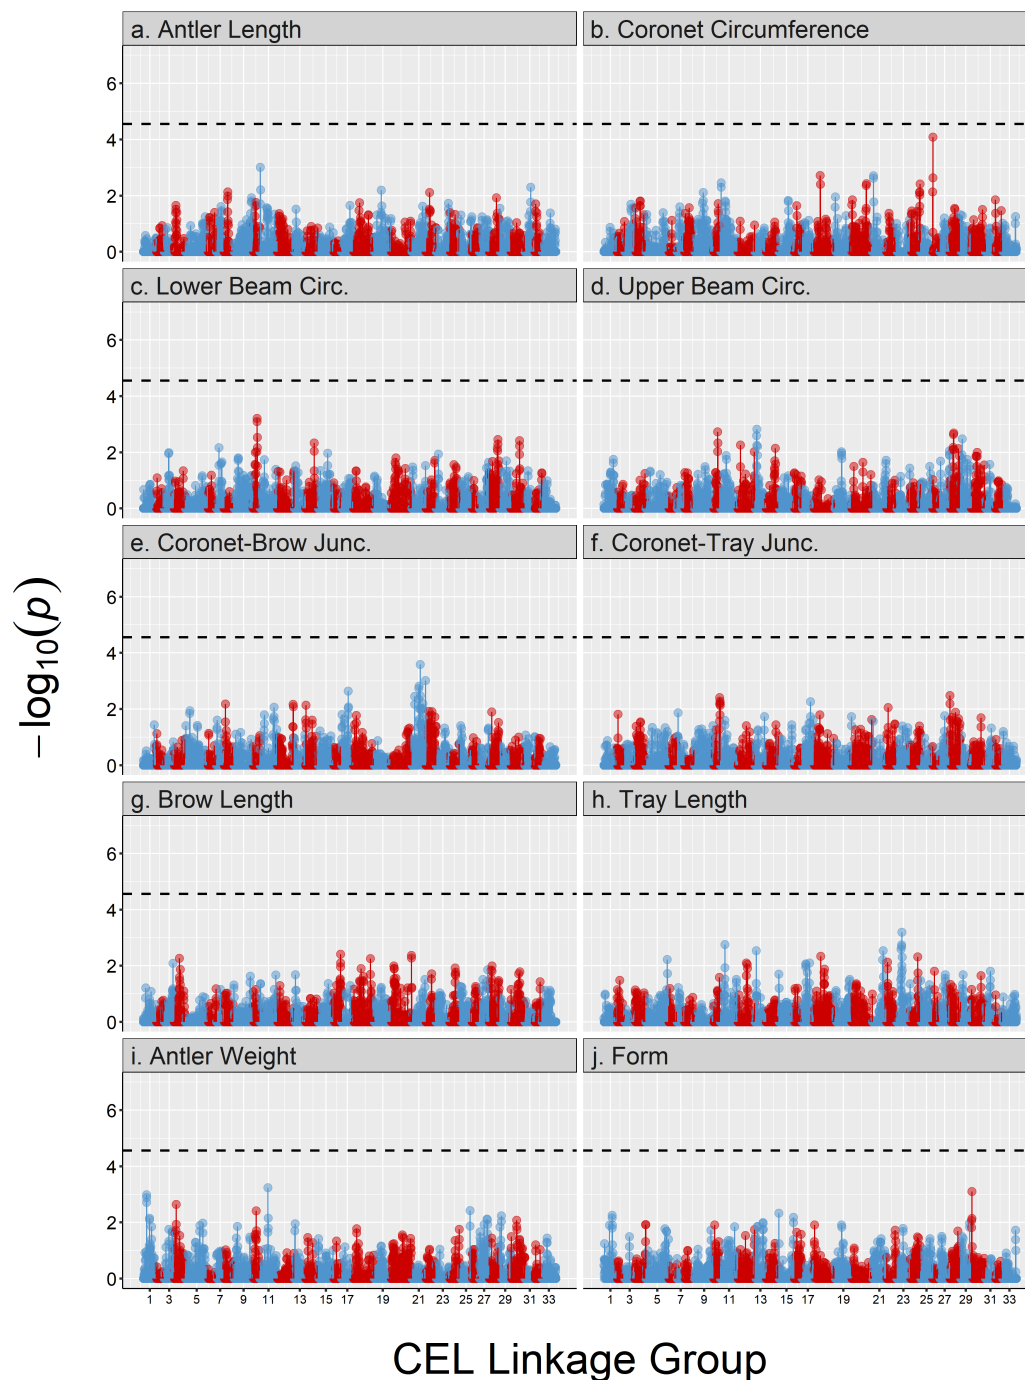

**Figure 5:** Regional heritability analysis for antler measures. The dashed line indicates the significance threshold equivalent to  $\alpha = 0.05$ . Points are colour-coded by chromosome. Underlying data is provided in Table S6

## 369 Distribution and quantification of SNP effect sizes

370 A total of 897 unique SNPs had significant non-zero effects across the ten antler  
371 measures (Table 4; full results are provided in Table S11). The number of significant  
372 non-zero SNPs ranged from 15 SNPs (antler length) to 279 SNPs (lower beam  
373 circumference; Table 4), although antler weight and upper beam circumference had no  
374 significant non-zero effect SNPs. Several SNPs showed pleiotropic effects i.e. they were  
375 associated with more than one measure (Table S11), with the underlying proportion  
376 ranging from 6% (coronet-tray junction) to 68% (tray length). Lower beam circumference  
377 and antler form showed distributions that included more extreme SNPs with large effects  
378 on phenotype outside the 5% to 95% quantile boundaries, whereas most other measures  
379 had more uniformly distributed effect sizes (Table 4). For the 11 antler PCs, only 159  
380 unique SNPs had non-zero effects (Table S10; full results in Table S12). No pleiotropic  
381 SNPs were observed, most likely due to the independence of each PC. PC4 and PC9 had  
382 no non-zero effect SNP associations. Only about 25% of the 159 SNPs were in common  
383 with the 897 SNPs in the antler measure analysis. This was mainly due to the higher  
384 order PCs (PC6 to PC11) sharing no SNP associations with any antler measures, while  
385 other PCs had similar or more numbers of shared and unique SNPs (PC1 and PC2).

386 Some of the non-zero effect SNPs with large effect size estimates after FDR explained  
387 large proportions of overall genetic and phenotypic variance for their respective traits. The  
388 SNP *cela1\_red\_2\_101997097* explained about 17% of the overall additive genetic and  
389 4% of phenotypic variance in antler length (SNP variance = 2.609, SE = 1.094), while for  
390 PC8 (which is strongly representative of antler length; Figure 2) the marker  
391 *cela1\_red\_4\_41756873* explained 39% of the additive genetic and 4% of the phenotypic  
392 variance (SNP variance = 0.019, SE = 0.008). Despite these seemingly large effect  
393 marker associations the standard errors for the SNP variance estimates were generally  
394 large (see Tables S13 and S14 for summaries of variances, and Tables S15 and S16 for  
395 full results for the antler measures and PCs, respectively). Overall, as the uncertainty  
396 around the importance of the SNP effects is large and none of these marker achieved  
397 genome-wide significance in any of the GWAS, the influence of specific SNP loci on  
398 variation in antler measures and PCs must be interpreted with caution.

**Table 4:** Summary of SNPs with non-zero effects on antler measures. N SNPs is the number of SNPs with non-zero effects. Proportion pleiotropic is the proportion of SNPs with non-zero effects on other antler measures. Maximum and minimum effects are given relative to the data scale (units = cm for lengths, g for weight). Lower and upper quantiles refer to the 5% and 95% boundaries of the effect size distribution respectively.

| <b>Antler Measure</b> | <b>N SNPs</b> | <b>Proportion<br/>Pleiotropic</b> | <b>Maximum<br/>Effect</b> | <b>Minimum<br/>Effect</b> | <b>Lower<br/>Quantile</b> | <b>Upper<br/>Quantile</b> |
|-----------------------|---------------|-----------------------------------|---------------------------|---------------------------|---------------------------|---------------------------|
| Antler Length         | 15            | 0.4001                            | 0.668                     | -0.622                    | -0.619                    | 0.653                     |
| Coronet Circ.         | 56            | 0.214                             | 0.151                     | -0.159                    | -0.152                    | 0.146                     |
| Lower Beam Circ.      | 279           | 0.136                             | 0.251                     | -0.151                    | -0.120                    | 0.144                     |
| Upper Beam Circ.      | 0             | -                                 | -                         | -                         | -                         | -                         |
| Coronet-Brow Junc.    | 29            | 0.138                             | 0.092                     | -0.084                    | -0.084                    | 0.091                     |
| Coronet-Tray Junc.    | 110           | 0.055                             | 0.460                     | -0.490                    | -0.435                    | 0.441                     |
| Brow Length           | 272           | 0.081                             | 0.538                     | -0.532                    | -0.484                    | -0.477                    |
| Tray Length           | 6             | 0.667                             | 0.357                     | -0.357                    | -0.355                    | 0.354                     |
| Antler Weight         | 0             | -                                 | -                         | -                         | -                         | -                         |
| Form                  | 193           | 0.124                             | 1.018                     | -0.097                    | -0.091                    | 0.096                     |



## 399 Discussion

400 In this study, we have used a genomic approach to determine the genetic architecture of  
 401 antler morphology in the red deer of Rum. We have shown that antler morphology is  
 402 heritable and repeatable over an individual's lifetime, and that it is likely to be highly  
 403 polygenic with a moderate degree of shared genetic architecture across different antler  
 404 traits. Genome-wide association and regional heritability studies failed to identify any  
 405 genomic regions associated with antler measures and their principal components, with  
 406 the exception of a single region on linkage group 21 associated with variation in PC9.  
 407 Most traits were underpinned by SNPs with uniformly small effect sizes, whereas others,  
 408 such as coronet circumference and antler form, showed distributions that included some  
 409 SNPs with larger effects on phenotype. Our findings suggest that antler morphology has a  
 410 highly polygenic architecture with many loci of small effect. Here, we discuss how our  
 411 findings build on previous quantitative genetic studies in the Rum red deer system, and  
 412 how they inform the broader question of the distribution of genetic architectures of  
 413 sexually selected male weaponry and the consequences for its evolution.

### 414 Heritability and repeatability of antler morphology.

415 All 10 antler measures were significantly heritable (ranging from 0.229 to 0.414, Table 2)  
 416 and were similar to previous heritability estimates for antler weight and form in the same  
 417 population (Kruuk *et al.*, 2014). The strong agreement of estimates from both the pedigree  
 418 and GRM approaches indicate that the SNPs present on the red deer SNP chip are in  
 419 sufficiently high LD with causative loci to allow accurate estimation of trait heritabilities  
 420 in this population (Yang *et al.* 2010; Figure 3). Indeed, LD is maintained at a relatively  
 421 constant level over a distance of up to 1Mb, after which it starts to slowly decay (Figure  
 422 S1). All antler traits were also highly repeatable, with between 38.5% and 66.1% of the  
 423 phenotypic variance explained by additive genetic, permanent environment and birth year  
 424 effects. This indicates that antler morphology is temporally stable over an individual's adult  
 425 life, despite the annual shedding and regrowth of antlers. Similar findings were found for

the 11 principal components, with lower order PCs generally exhibiting higher heritabilities and repeatabilities (Table S2); we discuss why we think this is the case in the section on genetic correlations and constraints below. It should be noted that the heritabilities may be slightly over-estimated due to any common environments on a fine spatio-temporal scale that cannot be captured by the animal models (Stopher *et al.*, 2012). These findings support previous work showing that traits under sexual selection can have substantial underlying genetic variation in wild populations (Kruuk *et al.*, 2008; Merila *et al.*, 2001; Pomiankowski & Moller, 1995), where morphological traits often show heritabilities of a similar magnitude even when associated with fitness (Johnston *et al.*, 2013; Bérénos *et al.*, 2014; Bourret *et al.*, 2017; Malenfant *et al.*, 2018).

### **The polygenic architecture of antler morphology.**

Genome-wide association studies and regional heritability analyses across all antler traits and PCs showed no significant associations, with the exception PC9 (discussed in the next section). Generally, GWAS can only detect loci with moderate to large effects on phenotype and which only partially explain the trait heritabilities, with the remainder termed the “missing heritability” (Manolio *et al.*, 2009; Golan *et al.*, 2014). For example, a meta-analysis of human GWAS found that the heritability attributed to all common SNP variants was significantly higher than that of the SNPs that achieved genome-wide significance. (Shi *et al.*, 2016), meaning that large numbers of “non-significant” SNPs will contribute to the additive genetic variation. To characterise the genetic architecture beyond GWAS alone, we employed two additional approaches. The first, regional heritability (Nagamine *et al.*, 2012), incorporated the haplotypic diversity within genomic regions. This approach detected a large contribution of defined genomic regions to a single PC, but not to any of the other antler measures or PCs. The second, the Empirical Bayes false discovery rate and effect size estimation, incorporated information from the GWAS effect size estimates and their error to show that a substantial number of SNPs had non-zero effects on antler morphology (Stephens, 2016). Taken together, these analyses provide compelling evidence that most aspects of antler morphology have a highly polygenic architecture (Fisher, 1930; Barton *et al.*, 2017). This is in line with findings

from other studies of wild organisms that have identified polygenic architectures for morphological and life history traits (Robinson *et al.*, 2013; Santure *et al.*, 2013; Pallares *et al.*, 2014; Berenos *et al.*, 2015; Husby *et al.*, 2015). In this study, we modelled antler morphology using both independent measures of antler morphology and a principal component framework to characterise different dimensions of shape variation. An advantage of using both approaches was that it allowed us to identify a greater number of potentially causal loci, which supports the usefulness of this approach when trying to characterise the genetic architecture of a complex morphological trait (such as in Pallares *et al.* 2014).

# **Genomic regions associated with antler morphology.**

Three genomic windows within the CEL linkage group were associated with PC9 at the genome-wide level. The main contributing antler measure to PC9 is coronet circumference. The region covered by the most highly associated window explained ~66% of the additive genetic variance, representing a large part of the overall heritability estimated using the whole GRM (~19%). The region contains a number of candidate genes among which are gasdermin C (*GSDMC*); MYC proto-oncogene (*MYC*); ArfGAP with SH3 domain, ankyrin repeat and PH domain 1 (*ASAP1*) and cellular communication network factor 4 (*CCN4*). Whilst none have previously been implicated in antler morphology, they have associated functions that make them potential candidate genes. Both the enhancer protein *ASAP1* and *CCN4*, which is a type of connective tissue growth factor, are linked to bone ossification and bone cell differentiation in mice (The Jackson Laboratory, 2019; Schreiber *et al.*, 2019; Maeda *et al.*, 2015), processes which are likely to be vital to antler regeneration, rapid growth and the ability of antlers to withstand impact (Goss, 1983). Upregulation of *GSDMC* is implicated in carcinogenesis in mice, as a consequence of an interrupted growth factor signalling pathway (Miguchi *et al.*, 2016) and *MYC* is a potent oncogene that is implicated in many human cancers and promotes rapid tumor cell proliferation (Beroukhi *et al.*, 2010; Lin *et al.*, 2012); recent work suggests that rapid regeneration of bony antlers has evolved by upregulating cell proliferation pathways while suppressing tumorigenesis (Wang *et al.*, 2019).

484 Despite being linked to compelling candidate gene regions, with our current data it is  
485 virtually impossible to determine exactly which genes in this region drive the association  
486 with PC9. Furthermore, as PC9 only represents ~4% of the overall phenotypic variance  
487 among all antler PCs, we expect effect sizes of causal loci to be very small. Validating the  
488 findings for this association would be challenging, as replication of a similar PC in other  
489 deer populations would have to consider its main contributing antler measures (e.g.  
490 coronet circumference); additionally, the same variants may not be associated with this  
491 trait in different populations. A more feasible approach may be to type a higher density of  
492 SNP loci to characterise more variation at (or in tight linkage) with potential causal loci in  
493 the Rum deer population.

#### 494 **Genetic correlations and constraints on antler morphology.**

495 Almost all antler traits were positively genetically correlated, with the exception of the  
496 coronet-tray junction, which was negatively genetically correlated with tray length, lower  
497 beam circumference and antler form. These findings were reflected by the PC analysis,  
498 where the PC explaining the most variance in antler morphology (PC1, ~41%) combined  
499 equal information from all antler measures, whereas those explaining declining amounts  
500 of variation represented one or two antler traits. The Empirical Bayes analysis identified  
501 varying degrees of marker pleiotropy associated with the antler measures (Table 4) that  
502 were consistent with the observed genetic correlations. Nevertheless, there were some  
503 exceptions, such as for brow length and antler weight, which both showed strong positive  
504 genetic correlations yet had small proportions of shared loci (brow length) or no  
505 associated loci at all (antler length). This incongruity may be explained by the large  
506 variation in the number of non-zero effect SNPs detected between antler measures, which  
507 could be due to differences in the effect size distribution of markers.

508 The large heritabilities of individual antler traits suggest there is potential for response to  
509 selection, but our results further add to previous findings that constraints at the genetic  
510 level may affect how the population may respond to selection. Previous work showed that  
511 a large part of genetic variance in antler weight is not available to selection due to the lack

of genetic covariance between weight and fitness (Kruuk *et al.*, 2002, 2014). In the current study, antler weight was highly correlated with most other antler measures on a genetic level, which may likely indicate that large parts of the genetic variance of these antler measures are also unavailable for selection, thus limiting the evolutionary potential of antler morphology despite large heritability estimates. In the PC analysis, higher order PCs explained much smaller amounts of variation and had very low additive genetic variation. It is possible that these PCs could represent morphologically stable aspects of the antlers, where lower heritabilities could indicate past strong stabilising selection on the combination of trait aspects represented by that PC. Other studies exploring multivariate sexual selection on a suite of traits found that despite large genetic variance in univariate analyses, there can be very little genetic variance available in the trait composition that is the target of selection (Hunt *et al.*, 2007; Van Homrigh *et al.*, 2007).

The discovery that the genetic architecture of antler morphology is highly polygenic also suggests that further evolutionary mechanisms may be partially responsible for the maintenance of genetic variation in this trait. As discussed in the introduction, traits with many genes of small effect can present a large mutational target for the introduction of novel genetic variation which can contribute to the genetic variation in a trait (Rowe & Houle, 1996). Consequently, although selection on polygenic traits can lead to rapid changes in trait mean, under the infinitesimal model the distribution of underlying genetic effects is expected to remain relatively constant, counteracting the loss of genetic variation. (Barton *et al.*, 2017; Sella & Barton, 2019). Finally, pleiotropic effects of loci that share a similar complex architecture with other traits and/or are in LD with loci associated with fitness could maintain genetic variation through conflicts and trade-offs (Lande, 1982).

## Conclusions

In this study, we have shown that antler morphology is heritable, has a polygenic genetic architecture, and some degree of shared genetic architecture between different antler measures. A single region association is linked to candidate genes that could potentially

540 have an effect on antler morphology, but more work would be required to validate this  
541 finding in this and other populations. Future work in this system will integrate knowledge  
542 of the genomic architecture of antler morphology with fitness measures to further dissect  
543 constraints on trait evolution within this population. Ultimately, our findings corroborate the  
544 expectation for a quantitative trait such as multidimensional weaponry traits to conform to  
545 a polygenic genetic architecture of many genes with small effects.

## 546 **Author Contributions**

547 L.P. and S.E.J. designed the study. J.M.P and L.K provided the data. L.P., J.H and S.E.J.  
548 analysed the data. L.P. and S.E.J. wrote the first draft of the paper and all authors  
549 contributed to revisions.

## 550 **Acknowledgements**

551 We thank Alison Morris, Sean Morris, Martin Baker, Fiona Guinness, Tim Clutton-Brock  
552 and many others for collecting field data and DNA samples over the course of the  
553 long-term study. We thank Scottish Natural Heritage for permission to work on the Isle of  
554 Rum National Nature Reserve. Andy Arthur kindly provided Figure 1. Philip Ellis prepared  
555 samples for DNA extraction and the Wellcome Trust Clinical Research Facility Genetics  
556 Core in Edinburgh performed the genotyping. This work made extensive use of the  
557 University of Edinburgh Compute and Data Facility (<http://www.ecdf.ed.ac.uk/>). The  
558 long-term project on Rum red deer is funded by the UK Natural Environment Research  
559 Council (NERC) and the SNP genotyping was funded by a European Research Council  
560 Advanced Grant to J.M.P.. L.P is supported by a NERC E3 Doctoral Training Programme  
561 PhD Studentship. S.E.J. is supported by a Royal Society University Research Fellowship.

## 562 References

- 563 Andersson M (1994) *Sexual selection*. Princeton University Press, Princeton, NJ, USA.
- 564 Aulchenko YS, Ripke S, Isaacs A, Van Duijn CM (2007) GenABEL: an R library for genome-  
565 wide association analysis. *Bioinformatics*, **23**, 1294–1296.
- 566 Barson NJ, Aykanat T, Hindar K, *et al.* (2015) Sex-dependent dominance at a single locus  
567 maintains variation in age at maturity in salmon. *Nature*, **528**, 405–408.
- 568 Barton N, Etheridge A, Véber A (2017) The infinitesimal model: Definition, derivation, and  
569 implications. *Theoretical Population Biology*, **118**, 50–73.
- 570 Berenos C, Ellis PA, Pilkington JG, Lee SH, Gratten J, Pemberton JM (2015) Heterogeneity  
571 of genetic architecture of body size traits in a free-living population. *Molecular Ecology*,  
572 **24**, 1810–1830.
- 573 Bérénois C, Ellis PA, Pilkington JG, Pemberton JM (2014) Estimating quantitative genetic  
574 parameters in wild populations: A comparison of pedigree and genomic approaches.  
575 *Molecular Ecology*, **23**, 3434–3451.
- 576 Beroukhi R, Mermel CH, Porter D, *et al.* (2010) The landscape of somatic copy-number  
577 alteration across human cancers. *Nature*, **463**, 899–905.
- 578 Bourret A, Belisle M, Pelletier F, Garant D (2017) Evolutionary potential of morphological  
579 traits across different life-history stages. *Journal of Evolutionary Biology*, **30**, 616–626.
- 580 Brauning R, Fisher PJ, McCulloch AF, *et al.* (2015) Utilization of high throughput genome  
581 sequencing technology for large scale single nucleotide polymorphism discovery in red  
582 deer and Canadian elk. *bioRxiv*.
- 583 Butler DG, Cullis BR, Gilmour AR, Gogel BJ (2009) Mixed Models for S language  
584 Environments: ASReml-R reference manual.
- 585 Chang CC, Chow CC, Tellier LC, Vattikuti S, Purcell SM, Lee JJ (2015) Second-generation  
586 PLINK: Rising to the challenge of larger and richer datasets. *GigaScience*, **4**, 7.



587 Charmantier A, Gienapp P (2014) Climate change and timing of avian breeding and  
588 migration: evolutionary versus plastic changes. *Evolutionary Applications*, **7**, 15–28.

589 Chenoweth SF, McGuigan K (2010) The Genetic Basis of Sexually Selected Variation.  
590 *Annual Review of Ecology, Evolution, and Systematics*, Vol 41, **41**, 81–101.

591 Clutton-Brock T, Guinness F, Albon S (1982) *Red Deer. Behaviour and Ecology of Two*  
592 *Sexes*. University of Chicago Press.

593 Connallon T, Hall MD (2018) Genetic constraints on adaptation: a theoretical primer for the  
594 genomics era. *Annals of the New York Academy of Sciences*, **1422**, 65–87.

595 Davis EB, Brakora KA, Lee AH (2011) Evolution of ruminant headgear: A review.  
596 *Proceedings of the Royal Society B: Biological Sciences*, **278**, 2857–2865.

597 Devlin B, Roeder K (1999) Genomic control for association studies. *Biometrics*, **55**, 997–  
598 1004.

599 Dobzhansky T (1971) *Genetics of the evolutionary process*, vol. 139. Columbia University  
600 Press.

601 Dugand RJ, Tomkins JL, Kennington WJ (2019) Molecular evidence supports a genic  
602 capture resolution of the lek paradox. *Nature Communications*, **10**, 1359.

603 Emlen DJ (1994) Environmental control of horn length dimorphism in the beetle  
604 *Onthophagus acuminatus* (Coleoptera: Scarabaeidae). Tech. Rep..

605 Falconer DS, Mackay TFC (1996) *Introduction to quantitative genetics*. Longman, Harlow,  
606 fourth edn..

607 Fisher RA (1930) *The genetical theory of natural selection*. The Clarendon Press, Oxford.

608 Golan D, Lander ES, Rosset S (2014) Measuring missing heritability: inferring the  
609 contribution of common variants. *Proceedings of the National Academy of Sciences*  
610 *of the United States of America*, **111**, 5272–81.

611 Goss RJ (1983) *Deer Antlers: Regeneration, Function and Evolution*. Academic Press.

612 Griffith SC, Owens IP, Burke T (1999) Environmental determination of a sexually selected  
613 trait. *Nature*, **400**, 358–360.



- 614 Henderson CR (1975) Best Linear Unbiased Estimation and Prediction under a Selection  
615 Model. *Biometrics*, **31**, 423–447.
- 616 Hendrickx F, De Corte Z, Sonet G, Belleghem SMV, Köstlbacher S, Vangestel C (2021) A  
617 masculinizing supergene underlies an exaggerated male reproductive morph in a spider.  
618 *bioRxiv*, p. 2021.02.09.430505.
- 619 Huisman J (2017) Pedigree reconstruction from SNP data: parentage assignment, sibship  
620 clustering and beyond. *Molecular Ecology Resources*, **17**, 1009–1024.
- 621 Huisman J, Kruuk LEB, Ellis PA, Clutton-Brock T, Pemberton JM (2016) Inbreeding  
622 depression across the lifespan in a wild mammal population. *Proceedings of the National  
623 Academy of Sciences of the United States of America*, **113**, 3585–3590.
- 624 Hunt J, Blows MW, Zajitschek F, Jennions MD, Brooks R (2007) Reconciling strong  
625 stabilizing selection with the maintenance of genetic variation in a natural population  
626 of black field crickets (*Teleogryllus commodus*). *Genetics*, **177**, 875–880.
- 627 Husby A, Kawakami T, Rönnegård L, Smeds L, Ellegren H, Qvarnström A (2015) Genome-  
628 wide association mapping in a wild avian population identifies a link between genetic and  
629 phenotypic variation in a life-history trait. *Proceedings of the Royal Society B: Biological  
630 Sciences*, **282**.
- 631 Jackson CH (2011) Multi-State Models for Panel Data: The **msm** Package for  
632 *R*. *Journal of Statistical Software*, **38**, 1–28.
- 633 Jamieson A, Anderson SJ, Fuller J, Côté SD, Northrup JM, Shafer AB (2020) Heritability  
634 estimates of antler and body traits in white-tailed deer (*Odocoileus virginianus*) from  
635 genomic-relatedness matrices. *Journal of Heredity*, **111**, 429–435.
- 636 Johnston SE, Gratten J, Berenos C, *et al.* (2013) Life history trade-offs at a single locus  
637 maintain sexually selected genetic variation. *Nature*, **502**, 93–95.
- 638 Johnston SE, Huisman J, Ellis PA, Pemberton JM (2017) A High-Density Linkage Map  
639 Reveals Sexual Dimorphism in Recombination Landscapes in Red Deer (*Cervus  
640 elaphus*). *G3-Genes Genomes Genetics*, **7**, 2859–2870.

- 641 Johnston SE, Huisman J, Pemberton JM (2018) A Genomic Region Containing REC8  
642 and RNF212B Is Associated with Individual Recombination Rate Variation in a Wild  
643 Population of Red Deer (*Cervus elaphus*). *G3: Genes/Genomes/Genetics*, **8**, 2265–  
644 2276.
- 645 Johnston SE, McEwan JC, Pickering NK, *et al.* (2011) Genome-wide association mapping  
646 identifies the genetic basis of discrete and quantitative variation in sexual weaponry in a  
647 wild sheep population. *Molecular Ecology*, **20**, 2555–2566.
- 648 Kingsolver JG, Hoekstra HE, Hoekstra JM, *et al.* (2001) The strength of phenotypic  
649 selection in natural populations. *American Naturalist*, **157**, 245–261.
- 650 Kotiaho JS, Simmons LW, Tomkins JL (2001) Towards a resolution of the lek paradox.  
651 *Nature*, **410**, 684–686.
- 652 Kruuk LEB, Clutton-Brock T, Pemberton JM (2014) Case study: quantitative genetics  
653 and sexual selection of weaponry in a wild ungulate. In *Quantitative genetics in the*  
654 *wild* (edited by A Charmantier, D Garant, LEB Kruuk), chap. 10, pp. 160–176. Oxford  
655 University Press, 1st edn..
- 656 Kruuk LEB, Slate J, Pemberton JM, Brotherstone S, Clutton-Brock TH (2002) Antler size  
657 in red deer: heritability and selection but no evolution. *Evolution*, **56**, 1683–1695.
- 658 Kruuk LEB, Slate J, Wilson AJ (2008) New Answers for Old Questions: The Evolutionary  
659 Quantitative Genetics of Wild Animal Populations. *Annual Review of Ecology Evolution*  
660 *and Systematics*, **39**, 525–548.
- 661 Kuijper B, Pen I, Weissing FJ (2012) A guide to sexual selection theory. *Annual Review of*  
662 *Ecology, Evolution, and Systematics*, **43**, 287–311.
- 663 Lande R (1982) A Quantitative Genetic Theory of Life History Evolution. *Ecology*, **63**,  
664 607–615.
- 665 Lande R, Arnold SJ (1983) The Measurement of Selection on Correlated Characters.  
666 *Evolution*, **37**, 1210–1226.
- 667 Lewontin RC, *et al.* (1974) *The genetic basis of evolutionary change*, vol. 560. Columbia  
668 University Press New York.

- 669 Lin CY, Lovén J, Rahl PB, *et al.* (2012) Transcriptional amplification in tumor cells with  
670 elevated c-Myc. *Cell*, **151**, 56–67.
- 671 Lorch PD, Proulx S, Rowe L, Day T (2003) Condition-dependent sexual selection can  
672 accelerate adaptation. *Evolutionary Ecology Research*, **5**, 867–881.
- 673 Lukefahr SD, Jacobson HA (1998) Variance Component Analysis and Heritability of Antler  
674 Traits in White-Tailed Deer. *The Journal of Wildlife Management*, **62**, 262.
- 675 Maeda A, Ono M, Holmbeck K, *et al.* (2015) WNT1-Induced Secreted Protein-1 (WISP1),  
676 a novel regulator of bone turnover and Wnt signaling. *Journal of Biological Chemistry*,  
677 **290**, 14004–14018.
- 678 Malenfant RM, Davis CS, Richardson ES, Lunn NJ, Coltman DW (2018) Heritability of  
679 body size in the polar bears of Western Hudson Bay. *Molecular Ecology Resources*, **18**,  
680 854–866.
- 681 Malo AF, Roldan ERS, Garde J, Soler AJ, Gomendio M (2005) Antlers honestly advertise  
682 sperm production and quality. *Proceedings of the Royal Society of London B: Biological*  
683 *Sciences*, **272**, 149–57.
- 684 Manolio TA, Collins FS, Cox NJ, *et al.* (2009) Finding the missing heritability of complex  
685 diseases. *Nature*, **461**, 747–753.
- 686 Martínez-Ruiz C, Knell RJ (2017) Sexual selection can both increase and decrease  
687 extinction probability: reconciling demographic and evolutionary factors. *Journal of*  
688 *Animal Ecology*, **86**, 117–127.
- 689 McNamara JM, Houston AI (2009) Integrating function and mechanism. *Trends in Ecology*  
690 *& Evolution*, **24**, 670–675.
- 691 Merila J, Sheldon BC, Kruuk LEB, Merilä J, Sheldon BC, Kruuk LEB (2001) Explaining  
692 stasis: microevolutionary studies in natural populations. *Genetica*, **112**, 199–222.
- 693 Miguchi M, Hinoi T, Shimomura M, *et al.* (2016) Gasdermin C is upregulated by inactivation  
694 of transforming growth factor  $\beta$  receptor type II in the presence of mutated Apc,  
695 promoting colorectal cancer proliferation. *PLoS ONE*, **11**.

696 Nagamine Y, Pong-Wong R, Navarro P, *et al.* (2012) Localising Loci underlying Complex  
697 Trait Variation Using Regional Genomic Relationship Mapping. *Plos One*, **7**.

698 Nussey DH, Kruuk LE, Morris A, Clements MN, Pemberton JM, Clutton-Brock TH (2009)  
699 Inter- And intrasexual variation in aging patterns across reproductive traits in a wild red  
700 deer population. *American Naturalist*, **174**, 342–357.

701 Oba S, Sato M, Takemasa I, Monden M, Matsubara K, Ishii S (2003) A Bayesian missing  
702 value estimation method for gene expression profile data. *Bioinformatics*, **19**, 2088–  
703 2096.

704 Pallares LF, Harr B, Turner LM, Tautz D (2014) Use of a natural hybrid zone for genomewide  
705 association mapping of craniofacial traits in the house mouse. *Molecular Ecology*, **23**,  
706 5756–5770.

707 Pomiankowski A, Moller AP (1995) A Resolution of the Lek Paradox. *Proceedings of the*  
708 *Royal Society B-Biological Sciences*, **260**, 21–29.

709 Ritchie MG (2007) Sexual selection and speciation. *Annu. Rev. Ecol. Evol. Syst.*, **38**, 79–  
710 102.

711 Robinson MR, Pilkington JG, Clutton-brock TH, Pemberton JM, Kruuk LEB (2006) Live fast,  
712 die young: trade-offs between fitness components and sexually antagonistic selection on  
713 weaponry in Soay sheep. *Evolution*, **60**, 2168–2181.

714 Robinson MR, Santure AW, DeCauwer I, Sheldon BC, Slate J (2013) Partitioning of  
715 genetic variation across the genome using multimarker methods in a wild bird population.  
716 *Molecular Ecology*, **22**, 3963–3980.

717 Rönnegård L, McFarlane SE, Husby A, Kawakami T, Ellegren H, Qvarnstrom A (2016)  
718 Increasing the power of genome wide association studies in natural populations using  
719 repeated measures - evaluation and implementation. *Methods in Ecology and Evolution*,  
720 **7**, 792–799.

721 Rowe L, Houle D (1996) The lek paradox and the capture of genetic variance by condition  
722 dependent traits. *Proceedings of the Royal Society B-Biological Sciences*, **263**, 1415–  
723 1421.

- 724 Ruzicka F, Hill MS, Pennell TM, *et al.* (2019) Genome-wide sexually antagonistic variants  
725 reveal long-standing constraints on sexual dimorphism in fruit flies. *PLOS Biology*, **17**,  
726 e3000244.
- 727 Santure AW, De Cauwer I, Robinson MR, Poissant J, Sheldon BC, Slate J (2013) Genomic  
728 dissection of variation in clutch size and egg mass in a wild great tit ( *Parus major*  
729 ) population. *Molecular Ecology*, **22**, 3949–3962.
- 730 Santure AW, Garant D (2018) Wild GWAS-association mapping in natural populations.  
731 *Molecular Ecology Resources*, **18**, 729–738.
- 732 Schreiber C, Saraswati S, Harkins S, *et al.* (2019) Loss of ASAP1 in mice impairs  
733 adipogenic and osteogenic differentiation of mesenchymal progenitor cells through  
734 dysregulation of FAK/ Src and AKT signaling. *PLoS Genetics*, **15**, e1008216.
- 735 Sella G, Barton NH (2019) Thinking about the Evolution of Complex Traits in the Era of  
736 Genome-Wide Association Studies. *Annual Review of Genomics and Human Genetics*,  
737 **20**, 461–493.
- 738 Servedio MR, Bürger R (2014) The counterintuitive role of sexual selection in species  
739 maintenance and speciation. *Proceedings of the National Academy of Sciences*, **111**,  
740 8113–8118.
- 741 Shi H, Kichaev G, Pasaniuc B (2016) Contrasting the Genetic Architecture of 30 Complex  
742 Traits from Summary Association Data. *The American Journal of Human Genetics*, **99**,  
743 139–153.
- 744 Stacklies W, Redestig H (2018) Imputing missing values using the pcaMethods package.
- 745 Stephens M (2016) False discovery rates: a new deal. *Biostatistics*, **18**, kxw041.
- 746 Stopher KV, Walling CA, Morris A, *et al.* (2012) Shared Spatial Effects on Quantitative  
747 Genetic Parameters: Accounting for Spatial Autocorrelation and Home Range Overlap  
748 Reduces Estimates of Heritability in Wild Red Deer. *Evolution*, **66**, 2411–2426.
- 749 Svensson EI, Gosden TP (2007) Contemporary evolution of secondary sexual traits in the  
750 wild. *Functional Ecology*, **21**, 422–433.

751 The Jackson Laboratory (2019) Mouse Genome Database (MGD) at the Mouse Genome  
752 Informatics website.

753 Timpson NJ, Greenwood CMT, Soranzo N, Lawson DJ, Richards JB (2018) Genetic  
754 architecture: the shape of the genetic contribution to human traits and disease. *Nature*  
755 *Reviews Genetics*, **19**, 110–124.

756 Van Den Berg GH, Garrick DJ (1997) Inheritance of adult velvet antler weights and live  
757 weights in farmed red deer. *Livestock Production Science*, **49**, 287–295.

758 Van Homrigh A, Higgie M, McGuigan K, Blows MW (2007) The depletion of genetic  
759 variance by sexual selection. *Current Biology*, **17**, 528–532.

760 Wang Y, Zhang C, Wang N, *et al.* (2019) Genetic basis of ruminant headgear and rapid  
761 antler regeneration. *Science (New York, N.Y.)*, **364**, eaav6335.

762 Wang Z, Yang RC, Goonewardene LA, Huedepoh C (1999) Genetic analysis of velvet antler  
763 yield in farmed elk ( *Cervus elaphus* ). *Canadian Journal of Animal Science*, **79**,  
764 569–571.

765 Wilkinson GS, Breden F, Mank JE, *et al.* (2015) The locus of sexual selection: moving  
766 sexual selection studies into the post-genomics era. *Journal of Evolutionary Biology*, **28**,  
767 739–755.

768 Williams JD, Krueger WF, Harmel DH (1994) Heritabilities for antler characteristics and  
769 body weight in yearling white-tailed deer. *Heredity*, **73**, 78–83.

770 Yang J, Benyamin B, McEvoy BP, *et al.* (2010) Common SNPs explain a large proportion  
771 of the heritability for human height. *Nature Genetics*, **42**, 565–569.

772 Yang J, Lee H, Goddard ME, Visscher PM (2011a) GCTA: A Tool for Genome-wide  
773 Complex Trait Analysis. *The American Journal of Human Genetics*, **88**, 76–82.

774 Yang J, Manolio TA, Pasquale LR, *et al.* (2011b) Genome partitioning of genetic variation  
775 for complex traits using common SNPs. *Nature Genetics*, **43**, 519–U44.

776 Yengo L, Sidorenko J, Kemper KE, *et al.* (2018) Meta-analysis of genome-wide association  
777 studies for height and body mass index in ~700000 individuals of European ancestry.  
778 *Human molecular genetics*, **27**, 3641–3649.
